Donnelly et al: Immuno-metabolic Markers, Depression and Psychosis

## 1 Title

2 **Childhood Immuno-metabolic Markers and Risk of Depression and Psychosis in**  
3 **Adulthood: A Prospective Birth Cohort Study**

## 4 Article Type

5 Original Research Paper

## 6 Authors

7 Donnelly NA<sup>1,2</sup>; Perry BI<sup>3,4</sup>; Jones HJ<sup>1,5,6</sup>; Khandaker, GM<sup>1,2,3,4,5,6</sup>

## 8 Affiliations

9 <sup>1</sup> Centre for Academic Mental Health, Population Health Sciences, Bristol Medical School,  
10 University of Bristol, Bristol, UK

11 <sup>2</sup> Avon and Wiltshire Mental Health Partnership NHS Trust

12 <sup>3</sup> Department of Psychiatry, University of Cambridge

13 <sup>4</sup> Cambridgeshire and Peterborough NHS Foundation Trust

14 <sup>5</sup> NIHR Bristol Biomedical Research Centre, University of Bristol, Bristol, UK

15 <sup>6</sup> MRC Integrative Epidemiology Unit, University of Bristol

## 16 Keywords

17 ALSPAC; Depression; Psychosis; Leptin; Adipokines; Negative Symptoms

## 18 Word Count

19 Total: 4091 words

20 Introduction: 613 words

NOTE: This preprint reports new research that has not been certified by peer review and should not be used to guide clinical practice.

## Donnelly et al: Immuno-metabolic Markers, Depression and Psychosis

21 Discussion: 1318 words

## 22 List of Figures and Tables

23 The manuscript includes the following figures:

24 Figure 1: Correlations between Childhood Immuno-metabolic Markers

25 Figure 2: Associations of Childhood Metabolic Hormones with Adult Depression and  
26 Psychosis Measures

27 Figure 3: Associations of Childhood Immuno-Metabolic Factor Scores with Adult  
28 Depression and Psychosis Measures

29 The manuscript includes the following tables:

30 Table 1: Associations of Childhood Metabolic Hormones with Adult Depression and  
31 Psychosis Measures in the Whole Sample

32 Table 2: Associations of Childhood Immuno-Metabolic Factors with Adult Depression  
33 and Psychosis Measures in the Whole Sample

## 34 Abstract

### 35 Background

36 Metabolic and inflammatory disorders commonly co-occur with depression and psychosis,  
37 with emerging evidence implicating immuno-metabolic dysfunction in their aetiology.

38 Previous studies have reported metabolic dysfunction and inflammation in adults with  
39 depression and psychosis. However, longitudinal studies testing the direction of association,  
40 and the effects of different dimensions of early-life immuno-metabolic dysfunction on adult  
41 psychopathology, are limited.

### 42 Methods

43 Using data from 3875 birth cohort participants we examined longitudinal associations of  
44 three metabolic hormones (leptin, adiponectin, insulin) at age 9 with risks for depression-  
45 and psychosis-spectrum outcomes at age 24. In addition, using nine immuno-metabolic  
46 biomarkers, we constructed an exploratory bifactor model showing a general immuno-  
47 metabolic factor and three specific factors (adiposity, inflammation, and insulin resistance),  
48 which were also used as exposures.

### 49 Results

50 Childhood leptin was associated with adult depressive episode (adjusted odds ratio  
51 (aOR)=1.28; 95% CI, 1.00-1.64) and negative symptoms (aOR=1.12; 95% CI, 1.05-1.20).

52 The general immuno-metabolic factor was associated with depressive symptoms  
53 (aOR=1.05; 95% CI, 1.01-1.08) and psychotic experiences (aOR=1.20; 95% CI, 1.01-1.42).

54 The adiposity factor was associated with negative symptoms (aOR=1.07; 95% CI 1.02-1.12).

55 All associations tended to be stronger in women, though 95% credible intervals overlapped  
56 with that for men. In women, the inflammatory factor was associated with depressive  
57 episode (aOR=1.23; 95% CI, 1.01-1.47) and atypical depressive symptoms (aOR=1.10; 95%  
58 CI, 1.02-1.19).

59 **Conclusions**

60 While general immuno-metabolic dysfunction in childhood may contribute to risks for both  
61 psychotic and depressive symptoms in adulthood, childhood adiposity and inflammation are  
62 linked to affective (depressive, atypical, and negative) symptoms.

## 63 1. Introduction

64 Immuno-metabolic alterations are present in depressive and psychotic disorders, and are  
65 associated with excess mortality (Hoang et al., 2013; Milaneschi et al., 2020, 2019;  
66 Vancampfort et al., 2015). The prevalence of cardiometabolic disease (Penninx et al., 2001;  
67 van Melle et al., 2004), autoimmune inflammatory conditions (Benros et al., 2011; Eaton et  
68 al., 2006), and levels of circulating inflammatory markers (Khandaker et al., 2014; Osimo et  
69 al., 2019), are higher in people with depression and psychosis compared with controls.  
70 However, the direction of these relationships remains unclear. For example, while  
71 psychotropic medications can increase predisposition to cardiometabolic disorders  
72 (Vancampfort et al., 2015), there is evidence that predisposition towards cardiometabolic  
73 dysfunction predates treatment with psychotropic medications (Benseñor et al., 2012; Perry  
74 et al., 2016, 2021b; Pillinger et al., 2017). Therefore, longitudinal studies are required to  
75 address the issue of direction of association.

76 Emerging evidence from longitudinal studies suggests that inflammation may predate the  
77 onset of depression and psychosis. Using longitudinal data from the Avon Longitudinal Study  
78 of Parents and Children (ALSPAC) and Northern Finland Birth Cohort (NFBC) 1986 birth  
79 cohorts (Khandaker et al., 2014; Metcalf et al., 2017; Perry et al., 2021b), we have reported  
80 associations between higher circulating levels of interleukin 6 (IL-6) and C-reactive protein  
81 (CRP) in childhood and adolescence with risk of depression and psychosis subsequently in  
82 adulthood. Similar longitudinal associations have also been reported from the UK Whitehall  
83 (Gimeno et al., 2009), Dutch Generation R (Zalli et al., 2016) and the Netherlands Study of  
84 Depression and Anxiety (NESDA) (Lamers et al., 2020) cohorts. Using longitudinal repeated  
85 measures data from the ALSPAC cohort, we have reported higher risk of psychosis in  
86 adulthood associated with persistently high insulin levels across childhood, adolescence and  
87 early-adulthood, which may vary by sex (Perry et al., 2021b). These findings point to a role  
88 of immuno-metabolic alterations in childhood, a critical period for the development of the  
89 nervous, immune, and endocrine systems, in the aetiology of psychiatric disorders.

Donnelly et al: Immuno-metabolic Markers, Depression and Psychosis

90 Despite previous studies reporting obesity, altered glucose-insulin homeostasis, lipids, and  
91 other metabolic dysfunction in people with depression, psychosis and young people with  
92 psychotic experiences (Milaneschi et al., 2019; Perry et al., 2019; Vancampfort et al., 2015),  
93 longitudinal studies of childhood metabolic markers and subsequent depression and  
94 psychosis are relatively scarce. Particularly lacking are studies of metabolic hormones such  
95 as insulin, adiponectin and leptin, which are key neuroendocrine regulators of energy  
96 homeostasis. Immuno-metabolic biomarkers are interlinked and have pleiotropic functions.  
97 For instance, obesity is associated with systemic low-grade inflammation (Timpson et al.,  
98 2011; Yudkin et al., 1999), while insulin and leptin are influenced by inflammation and  
99 obesity (Considine et al., 1996; Jerry and Lesley, 2006; van Dielen et al., 2001). Commonly  
100 known as a satiety hormone, leptin is structurally similar to IL-6 and may have inflammatory  
101 functions (Abella et al., 2017). Additionally, previous studies have typically considered only a  
102 few immune or metabolic markers in isolation and ignored the underlying structure of  
103 covariance between biomarkers.

104 To address the issue of direction of association, we have carried out a longitudinal study  
105 testing the associations of three key metabolic hormones (insulin, leptin and adiponectin),  
106 measured in childhood at age 9 years, with several outcomes across the spectrum of  
107 depression (depressive episode, total symptom score, and atypical symptom score) and  
108 psychosis (psychotic disorder, at-risk mental state, psychotic experiences, negative  
109 symptoms) at age 24 years, in a whole analysis sample and in men and women separately,  
110 using data from the ALSPAC birth cohort. Furthermore, combining these hormones with  
111 related immuno-metabolic markers (BMI, LDL, HDL, triglycerides, IL-6, and CRP), also  
112 measured at age 9, we identified factors representing general and specific dimensions of  
113 early-life immuno-metabolic dysfunction, and tested their associations with psychiatric  
114 outcomes at age 24.

## 115 2. Materials and Methods

### 116 2.1 Cohort Profile

117 We used data from the ALSPAC birth cohort (Boyd et al., 2013; Fraser et al., 2013;  
118 Northstone et al., 2019), which recruited 14,541 pregnant women in the Avon area of the  
119 United Kingdom between 1990 and 1992; of these initial pregnancies 13,988 children were  
120 alive at 1 year of age. Further phases of recruitment occurred when the oldest children in the  
121 cohort were approximately 7 years of age, resulting in an additional 913 children being  
122 enrolled; giving a total cohort size of 15,454 pregnancies, resulting in 15,589 deliveries, of  
123 which 14,901 were alive at 1 year of age. The study is considered to be representative of the  
124 UK population (Golding et al., 2001).

125 Study data are collected and managed using the REDCap (Research Electronic Data  
126 Capture) tools hosted at the University of Bristol (Harris et al., 2019, 2009). Children and  
127 parents have been subsequently followed up with clinic and questionnaire assessments for a  
128 range of health outcomes. The ALSPAC study website contains details of all available data  
129 through a fully searchable data dictionary [http://www.bristol.ac.uk/alspac/researchers/our-](http://www.bristol.ac.uk/alspac/researchers/our-data/)  
130 [data/](http://www.bristol.ac.uk/alspac/researchers/our-data/).

131 Ethical approval for the study was obtained from the ALSPAC Ethics and Law Committee  
132 and the Local Research Ethics Committees  
133 (<http://www.bristol.ac.uk/alspac/researchers/research-ethics/>). Consent for biological  
134 samples was collected in accordance with the UK Human Tissue Act (2004). Informed  
135 consent for the use of data collected via questionnaires and clinics was obtained from  
136 participants following the recommendations of the ALSPAC Ethics and Law Committee at  
137 the time.

138 This study is reported in line with the Strengthening the Reporting of Observational Studies  
139 in Epidemiology (STROBE) reporting guideline for cohort studies.

140

## 141 2.2 Measurement of childhood immuno-metabolic biomarkers at age 9

142

### 143 2.2.1 Metabolic Hormones

144 Leptin, adiponectin and random insulin were measured at the cohort age 9 clinic visit

145 (**Supplementary Table 1**). As previously described (Falaschetti et al., 2010), non-fasting

146 blood samples were collected during clinic visits, using standard aseptic procedure and

147 immediately spun and frozen for long-term storage at -80°C. Blood biomarkers were

148 assayed in 2008 after a median of 7.5 years in storage with no previous freeze–thaw cycles

149 during storage. We did not include fasting insulin in this study due to the lower sample size

150 available for that measure (Ong et al., 2004). Leptin (ng/ml) was measured by an in-house

151 enzyme-linked immunosorbent assay (ELISA) validated against commercial methods.

152 Adiponectin (ng/ml) and random insulin (mU/l) was measured using an ultrasensitive

153 automated microparticle enzyme immunoassay (Mercodia), which does not cross-react with

154 proinsulin. All assay coefficients of variation were <6%.

### 155 2.2.2 Other Metabolic Biomarkers

156 We included plasma lipids (LDL, HDL and triglycerides (mmol/l)), also measured at the

157 cohort age 9 clinic visit (**Supplementary Table 1**). All were measured by a modification of

158 the standard Lipid Research Clinics Protocol using enzymatic reagents for lipid

159 determination.

### 160 2.2.3 Inflammatory Biomarkers

161 We included IL-6 and CRP, which were also measured at the cohort age 9 clinic visit

162 (**Supplementary Table 1**). IL-6 (pg/ml) was measured by ELISA (R&D systems, Abingdon,

163 UK), and CRP (mg/l) was measured by automated particle-enhanced immunoturbidimetric

164 assay (Roche UK, Welwyn Garden City, UK).



## 165 2.3 Assessment of Psychiatric Outcomes at age 24

### 166 2.3.1 Psychosis-Spectrum Outcomes

167 Psychotic positive symptoms were measured at age 24 with the psychosis-like symptoms  
168 (PLIKS) interview (Sullivan et al., 2020; Zammit et al., 2013). Interviews were undertaken  
169 using a semi-structured format by trained psychologists. Psychotic experiences (PEs) were  
170 defined as symptoms in 3 domains (hallucinations, delusions, and thought interference)  
171 occurring in the 6 months prior to the interview. After cross-questioning, PEs were rated as  
172 absent, suspected, or definite. We included definite PEs as our outcome of interest.

173 Psychotic disorder was defined as definite PLIKS, not attributable to sleep or fever, which  
174 occurred at least once a month in the past 6 months, which either caused the respondent to  
175 seek professional help, was very upsetting/distressing, and/or had a negative impact on their  
176 social/occupational life.

177 Cases of At Risk Mental State (ARMS) were defined by mapping the Comprehensive  
178 Assessment of the At Risk Mental State (CAARMS) criteria onto the PLIKS variables (Perry  
179 et al., 2021b). ARMs were defined as participants meeting CAARMS criteria for attenuated  
180 psychosis (symptoms not reaching the psychosis threshold owing to levels of intensity or  
181 frequency), brief limited intermittent psychosis (frank psychotic symptoms that resolved  
182 spontaneously within 1 week), or the CAARMS psychosis group.

183 Negative symptoms at age 24 were measured using ten questions from a self-administered,  
184 computerised version of the Community Assessment of Psychic Experiences (CAPE)  
185 questionnaire (Jones et al., 2016; Konings et al., 2006; Stefanis et al., 2002). We generated  
186 a single outcome variable by dichotomising responses to each question (each item was  
187 rated by participants on a 1-4 scale, we grouped responses 1 and 2 as “symptom present”,  
188 scoring 1 and responses 3 and 4 as “symptom absent”, scoring 0) and summing the  
189 resultant scores, giving each participant a negative symptom score from 0 - 10.

## 190 2.3.2 Depression Outcomes

191 Depressive symptoms at age 24 were measured using a self-administered, computerised  
192 version of the Clinical Interview Schedule, Revised (CIS-R) (Lewis et al., 1992). We took  
193 three outcomes from the CIS-R data: (1) a dichotomous depressive episode variable, based  
194 on a mapping of the CIS-R responses onto ICD-10 depression diagnostic criteria; (2) a  
195 symptom score which was constructed as a sum of scores of the mood, thoughts, fatigue,  
196 concentration, and sleep components for the CIS-R. This score ranged between 0 and 20.  
197 We also derived (3): an atypical depression symptoms score composed of the sum of  
198 participants scores on 4 items from the CIS-R: increased appetite, increased weight,  
199 hypersomnia and low energy. Note that the CIS-R does not contain a measure of “lead  
200 paralysis” as has been included in other measures of atypical depression (Lamers et al.,  
201 2020), as this measure is not part of many common depression screening instruments  
202 (Fried, 2017).

## 203 2.3.3 Confounders

204 We included maternal social class (determined using occupational status) and maternal  
205 highest educational level as potential confounders. IL-6 and BMI at age 9 (weight in kg  
206 divided by height in meters squared) were also included for analyses where they were not  
207 part of the predictors.

## 208 2.4 Statistical Analysis

### 209 2.4.1 Data Transformation

210 We log<sub>10</sub>-transformed all metabolic measures to give approximately normally distributed  
211 data, except for adiponectin, which was already approximately normally distributed. All  
212 continuous exposure and covariate variables were centred and standardised (mean value  
213 subtracted and then divided by the standard deviation). Therefore, odds ratios (ORs)  
214 represent change in outcome per SD change in exposure.

## 215 2.4.2 Exploratory Factor Analysis

216 Using adiponectin, insulin, leptin, IL-6, CRP, HDL, LDL, triglycerides, and BMI, we explored  
217 the underlying factor structure of the immuno-metabolic phenotype at age 9. Before analysis,  
218 we inverted HDL to match the cardiometabolic risk-increasing direction of other markers.

219 Factor analysis was done using the exploratory factor analysis (EFA) function in the  
220 *EFAtools* R package. The number of factors was selected after inspecting the results of a  
221 principal components analysis (**Supplementary Methods, Supplementary Figure 2**). We fit  
222 a one factor, three factor, and a bifactor model with 3 subfactors, and compared model fit  
223 (**Supplementary Table 2**). Compared to a one- or 3-factor model, the bifactor model was a  
224 better fit to our data. We then extracted factor scores for each factor for each subject (**see**  
225 **Supplementary Figure 2 and Supplementary Table 3 for factor loadings**).

## 226 2.4.3 Modelling Approach

227 We analysed data using R version 4.1.0 (R Development Core Team, 2017), fitting Bayesian  
228 regression models using the *brms* (Bürkner, 2017) and *rstanarm* packages (Carpenter et al.,  
229 2017). As the number of participants providing data for different outcomes varied, we fit each  
230 model to the largest possible dataset of complete cases for all covariates, exposures and  
231 outcomes (**see Supplementary Tables 4-6 for full details**).

232 We fit unadjusted models with a psychiatric outcome predicted by our exposure variables of  
233 interest (leptin, adiponectin and insulin). Next, we fit adjusted models with BMI at age 9,  $\log_{10}$   
234 IL-6, sex at birth and maternal socioeconomic class included as covariates. We also fit  
235 adjusted sex-stratified models to all female and male participants separately. For models  
236 using factor scores as exposures, we included all factor scores as exposures plus sex at  
237 birth and maternal socio-economic class as covariates.

238 We used regularising priors for all models (McElreath, 2018), calculating model estimate and  
239 the 95% credible interval, using the median and the highest density interval method. We  
240 present as summary statistics the probability of direction, which can be considered

241 analogous to the frequentist p-value (Makowski et al., 2019a, 2019b), and the Region of  
242 Practical Equivalence (ROPE), the proportion of the posterior falling within a set region  
243 around the null, here defined as an odds ratio in the range 0.9 – 1.1 (Kruschke and Liddell,  
244 2018). **See supplementary methods for further details.**

#### 245 2.4.4 Missing data

246 We analysed missingness in the dataset with two models: a model for missingness of clinic  
247 data at age 9, with predictors of maternal education, maternal social class and ethnicity and  
248 sex of the child; and a model for missingness for age 24 psychiatric data in the set of  
249 participants who had blood tests at age 9, with predictors of maternal education, maternal  
250 social class, ethnicity and sex of the child, and age 9 adiponectin, random insulin and leptin,  
251 IL-6 and BMI.

#### 252 2.4.5 Data Availability

253 In line with the ALSPAC data access policy, all raw data used for the work presented can be  
254 accessed by other investigators by making a request to the ALSPAC study executive (see  
255 <http://www.bristol.ac.uk/alspac/researchers/access/>).

## 256 3. Results

### 257 3.1 Childhood immuno-metabolic biomarker distributions, correlates, and 258 factor score calculation

259 Data on three metabolic hormones (insulin, leptin, adiponectin) and six related immuno-  
260 metabolic biomarkers (BMI, HDL, LDL, triglycerides, IL-6, and CRP) were available from  
261 total 3,875 participants at age 9 (**Supplementary Table 1**).

262 Higher leptin was associated with higher BMI (beta = 0.71; 95% credible interval [CI] 0.69-  
263 0.73), female sex (beta for girls compared to boys = 0.48; 95% CI 0.44 - 0.51) and higher IL-  
264 6 (beta = 0.04; 95% CI 0.02-0.05). Higher adiponectin was associated with lower BMI (beta  
265 = -0.14; 95% CI -0.16 - -0.11), female sex (beta = 0.12; 95% CI 0.07-0.18) and higher IL-6  
266 (beta = 0.04; 95% CI 0.01-0.06). Higher insulin was associated with higher BMI (beta = 0.22;  
267 95% CI 0.19-0.25, **see Supplementary Figure 1 and Supplementary Table 7**).

268 Immuno-metabolic biomarkers were correlated (correlations ranged from -0.18 for  
269 adiponectin-HDL to 0.75 for leptin-BMI, **Figure 1**). Using data for nine biomarkers we  
270 calculated a bifactor model identifying a general immuno-metabolic factor (G, loading on all  
271 biomarkers), and three sub-factors representing: (1) adiposity (loading on higher BMI, leptin  
272 and LDL); (2) inflammation (loading on higher IL-6 and CRP); and (3) insulin resistance  
273 (loading on higher triglycerides, insulin and lower HDL, **Supplementary Table 3**). There was  
274 no relationship between sex or maternal class and G; all sub-factors had higher mean values  
275 in females (**Supplementary Table 8**).

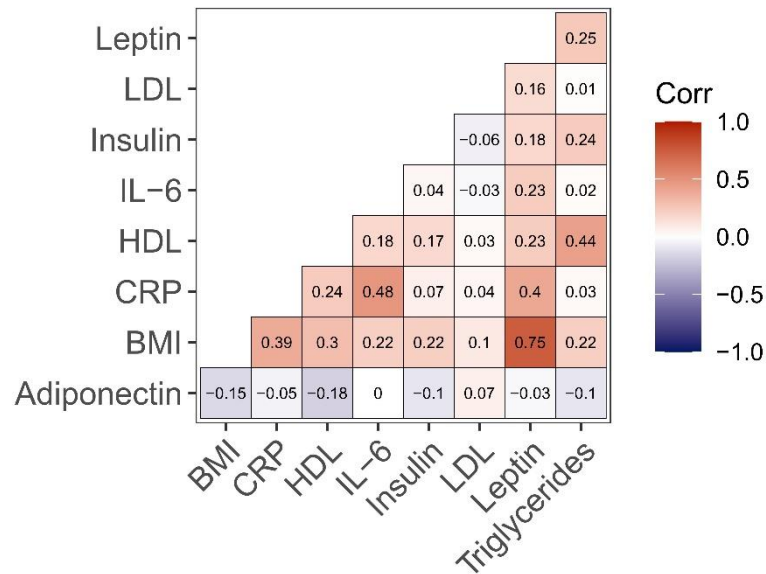

276

277 *Figure 1: Correlation between immuno-metabolic biomarkers at age 9 in the ALSPAC birth*  
 278 *cohort.*

279 Matrix of correlations between all 9 immuno-metabolic markers measured at age 9. Colour  
 280 represents correlation; negative correlations are represented in blue, positive correlations in  
 281 red. Numerical values are correlation coefficients.

### 282 3.2 Associations of childhood metabolic hormones with depression and 283 psychosis risk in adulthood

#### 284 3.2.1 Whole Sample Analysis

285 After adjusting for potential confounders, leptin at age 9 was associated with depressive  
 286 episode (adjusted odds ratio [aOR] =1.28; 95% CI, 1.00-1.64) and negative symptoms at  
 287 age 24 (aOR=1.12; 95% CI 1.05-1.20). Adiponectin was also associated with negative  
 288 symptoms (aOR=1.05; 95% CI 1.00-1.09 **Figure 2, Table 1**). Insulin was not associated with  
 289 any psychiatric outcome in our total sample.

290

Donnelly et al: Immuno-metabolic Markers, Depression and Psychosis

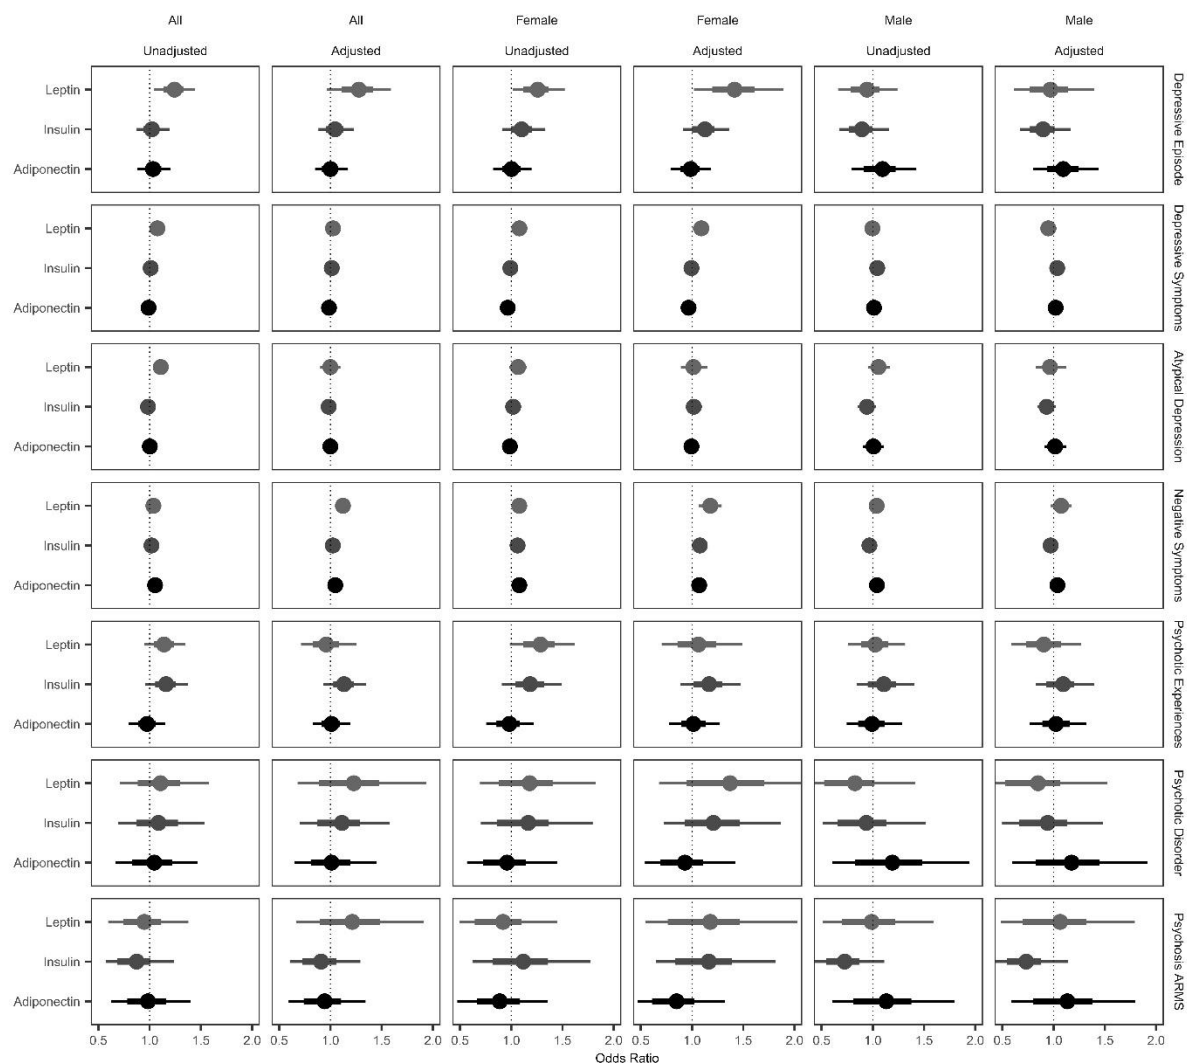

291

292 *Figure 2: Associations of Childhood Metabolic Hormones with Adult Depression and*  
 293 *Psychosis Measures in the Whole Sample*

294 Plots of estimated odds ratios for the effect of our exposures (adiponectin, insulin and leptin)  
 295 on psychiatric outcomes at age 24. Data are presented unadjusted and adjusted (for sex in  
 296 the all-participant model, IL-6 at age 9, BMI at age 9 and maternal social class) and grouped  
 297 by model: all participants, only females or only males. Thin bars represent the 95% credible  
 298 interval, thicker bars the 66% credible interval, and dots the median of the posterior  
 299 distribution for that parameter.

300 *Table 1: Associations of Childhood Metabolic Hormones with Adult Depression and Psychosis Measures in the Whole Sample*

| Outcome                            | Exposure    | Unadjusted Analysis   |         |          | Adjusted Analysis     |       |          |
|------------------------------------|-------------|-----------------------|---------|----------|-----------------------|-------|----------|
|                                    |             | Estimated OR (95% CI) | pd      | ROPE (%) | Estimated OR (95% CI) | pd    | ROPE (%) |
| Depressive Episode                 | Leptin      | 1.24 (1.06, 1.46)     | 0.009   | 7.73     | 1.28 (1.00, 1.64)     | 0.055 | 12.64    |
|                                    | Adiponectin | 1.03 (0.88, 1.20)     | 0.692   | 74.39    | 1.00 (0.85, 1.17)     | 0.996 | 76.58    |
|                                    | Insulin     | 1.02 (0.88, 1.20)     | 0.796   | 76.26    | 1.05 (0.88, 1.23)     | 0.607 | 69.80    |
| Depressive Symptoms Score          | Leptin      | 1.08 (1.04, 1.11)     | < 0.001 | 93.48    | 1.03 (0.97, 1.08)     | 0.374 | 99.64    |
|                                    | Adiponectin | 0.99 (0.96, 1.02)     | 0.519   | 100.00   | 0.99 (0.95, 1.02)     | 0.437 | 100.00   |
|                                    | Insulin     | 1.01 (0.98, 1.04)     | 0.549   | 100.00   | 1.01 (0.98, 1.05)     | 0.456 | 100.00   |
| Atypical Depressive Symptoms Score | Leptin      | 1.11 (1.04, 1.18)     | 0.002   | 45.73    | 1.00 (0.90, 1.10)     | 0.987 | 95.25    |
|                                    | Adiponectin | 1.00 (0.94, 1.07)     | 0.937   | 99.88    | 1.00 (0.94, 1.06)     | 0.985 | 99.86    |
|                                    | Insulin     | 0.98 (0.93, 1.05)     | 0.611   | 99.70    | 0.98 (0.93, 1.04)     | 0.572 | 99.71    |
| Negative Symptoms Score            | Leptin      | 1.04 (0.99, 1.08)     | 0.103   | 99.83    | 1.12 (1.05, 1.20)     | 0.001 | 33.27    |
|                                    | Adiponectin | 1.05 (1.01, 1.10)     | 0.015   | 98.78    | 1.05 (1.00, 1.09)     | 0.038 | 99.25    |
|                                    | Insulin     | 1.02 (0.98, 1.06)     | 0.400   | 100.00   | 1.02 (0.98, 1.07)     | 0.296 | 99.94    |
| Psychotic Experiences              | Leptin      | 1.14 (0.96, 1.36)     | 0.161   | 35.93    | 0.96 (0.73, 1.27)     | 0.760 | 50.54    |
|                                    | Adiponectin | 0.97 (0.80, 1.16)     | 0.779   | 70.13    | 1.01 (0.84, 1.21)     | 0.924 | 71.41    |
|                                    | Insulin     | 1.16 (0.97, 1.39)     | 0.100   | 30.24    | 1.13 (0.95, 1.37)     | 0.182 | 39.36    |
| Psychotic Disorder                 | Leptin      | 1.11 (0.73, 1.60)     | 0.604   | 34.23    | 1.23 (0.75, 2.06)     | 0.433 | 22.66    |



Donnelly et al: Immuno-metabolic Markers, Depression and Psychosis

|                |             |                   |       |       |                   |       |       |
|----------------|-------------|-------------------|-------|-------|-------------------|-------|-------|
|                | Adiponectin | 1.05 (0.71, 1.53) | 0.817 | 38.34 | 1.01 (0.66, 1.48) | 0.957 | 37.18 |
|                | Insulin     | 1.09 (0.73, 1.59) | 0.674 | 35.45 | 1.11 (0.74, 1.62) | 0.589 | 33.36 |
| Psychosis ARMS | Leptin      | 0.95 (0.61, 1.40) | 0.793 | 36.58 | 1.21 (0.72, 2.00) | 0.449 | 22.96 |
|                | Adiponectin | 0.98 (0.65, 1.45) | 0.938 | 37.08 | 0.94 (0.63, 1.39) | 0.780 | 36.27 |
|                | Insulin     | 0.87 (0.59, 1.26) | 0.494 | 31.34 | 0.91 (0.62, 1.31) | 0.629 | 34.92 |

301

### 302 3.2.2 Sex-Stratified Analysis

303 The associations of leptin with depressive episode (aOR=1.42; 95% CI 1.04-1.91), depressive  
304 symptoms (aOR=1.09; 95% CI 1.01-1.18) and negative symptoms (aOR=1.18; 95% CI 1.07-1.29)  
305 were stronger in women, as was the associations of adiponectin (aOR=1.07; 95% CI 1.01-1.13)  
306 and of insulin (aOR =1.08; 95% CI 1.01-1.14) with negative symptoms, although credible intervals  
307 overlapped with those for men (**Supplementary Tables 9&10**).

## 308 3.3 Associations of childhood immuno-metabolic factor scores with depression and 309 psychosis risk in adulthood

### 310 3.3.1 Whole Sample Analysis

311 The general immuno-metabolic factor, *G*, was associated with depression symptom score  
312 (OR=1.05; 95% CI 1.01-1.08) and psychotic experiences at age 24 (aOR=1.20; 95% CI 1.01-1.42,  
313 **Figure 3, Table 2**). The adiposity factor was associated with negative symptoms (aOR=1.07; 95%  
314 CI 1.02-1.12).

### 315 3.3.2 Sex-Stratified Analysis

316 There was stronger evidence of association between *G* and psychopathology in women than men.  
317 In women, *G* was associated with depression symptom score (aOR=1.05; 95% CI 1.01-1.09),  
318 atypical depression (aOR=1.07; 95% CI 1.00-1.15), and psychotic experiences (aOR=1.25; 95% CI  
319 1.01-1.52, **Supplementary Tables 11&12**) although credible intervals overlapped with those for  
320 men.

321 The inflammatory factor was associated with depressive episodes (aOR=1.23; 95% CI 1.01-1.47)  
322 and atypical depressive symptoms in women (aOR=1.10; 95% CI 1.02-1.19). The adiposity factor  
323 was associated with negative symptoms in women (aOR=1.09; 95% CI 1.03-1.16). The insulin  
324 resistance factor was not associated with any psychiatric outcomes at age 24. However, point  
325 estimates for the association between the insulin resistance factor and psychosis-related outcomes  
326 (PEs, ARMS, psychotic disorder) were considerably larger in men compared with women, although  
327 credible intervals were relatively wide (**Figure 3**).

Donnelly et al: Immuno-metabolic Markers, Depression and Psychosis

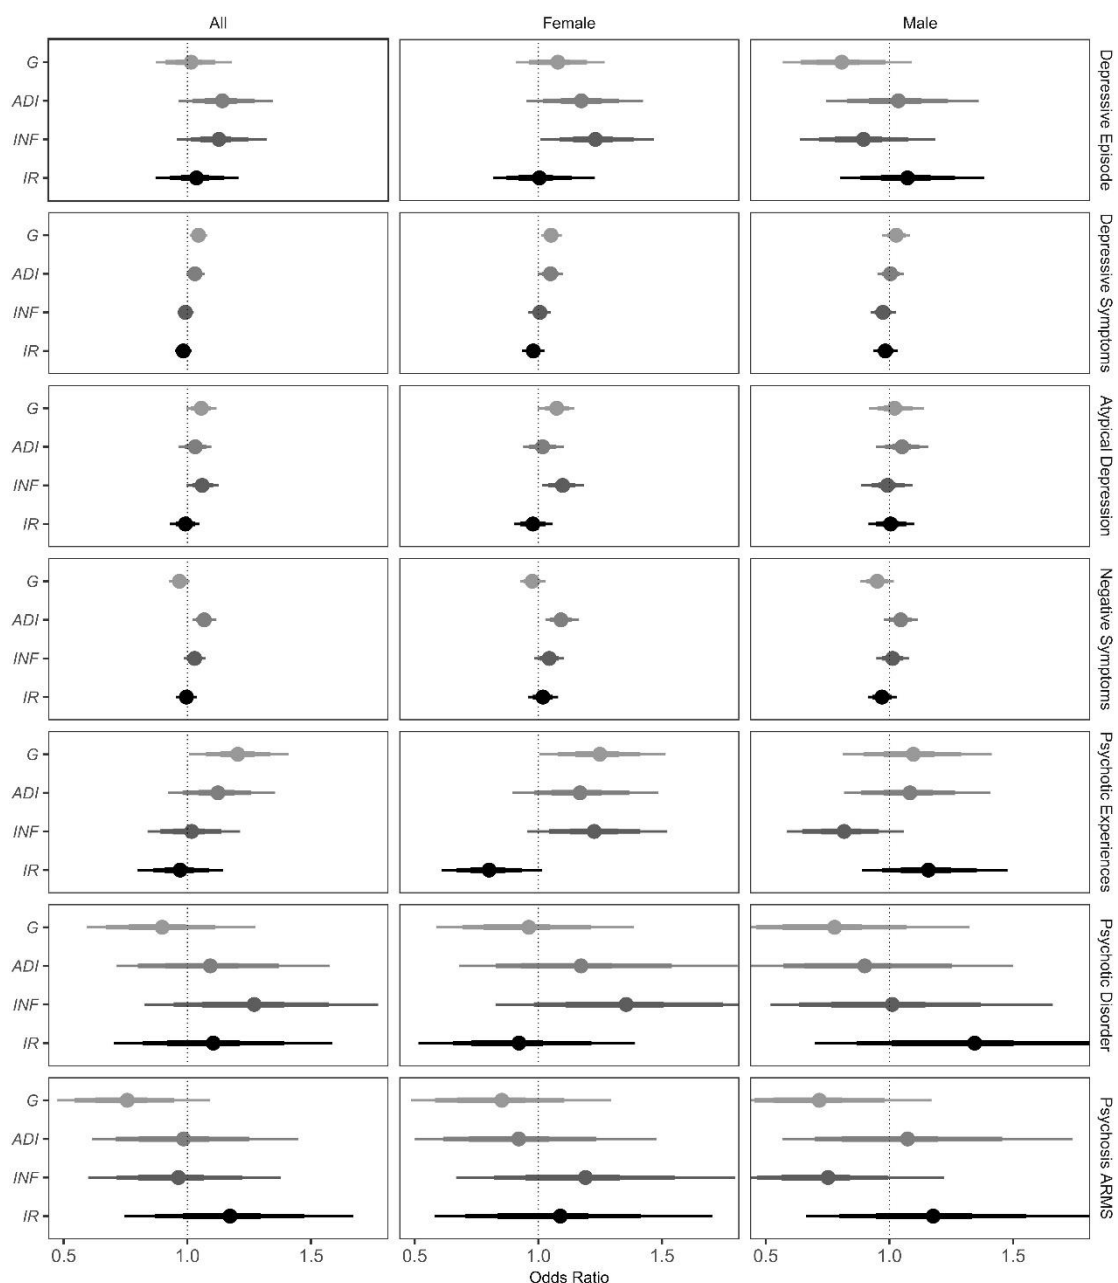

328

329 *Figure 3: Associations of Childhood Immuno-Metabolic Factors with Adult Depression and*  
 330 *Psychosis Measures in the Whole Sample*

331 Plots of estimated odds ratios for the effect of factor scores derived from a bifactor EFA model  
 332 (general factor (G) and three subfactors:(1) adiposity (ADI), (2) inflammation (INF) and (3) insulin  
 333 resistance (IR) on psychiatric outcomes at age 24. Data are adjusted (for maternal social class and  
 334 sex in the all-participant model) and grouped by model: either all participants, only females or only  
 335 males. Thin bars represent the 95% credible interval, thicker bars the 66% credible interval, and  
 336 dots the median of the posterior distribution for that parameter.

337

Donnelly et al: Immuno-metabolic Markers, Depression and Psychosis

338 *Table 2: Associations of Childhood Immuno-Metabolic Factors with Adult Depression and*  
 339 *Psychosis Measures in the Whole Sample*

| <b>Outcome</b>                       | <b>Exposure<br/>(Immuno-metabolic Factors)</b> | <b>Estimated OR<br/>(95% CI)</b> | <b>pd</b> | <b>ROPE<br/>(%)</b> |
|--------------------------------------|------------------------------------------------|----------------------------------|-----------|---------------------|
| Depressive Episode                   | General factor                                 | 1.02 (0.87, 1.18)                | 0.843     | 79.33               |
|                                      | Adiposity factor                               | 1.14 (0.97, 1.35)                | 0.121     | 34.71               |
|                                      | Inflammation factor                            | 1.13 (0.97, 1.33)                | 0.141     | 40.11               |
|                                      | Insulin resistance factor                      | 1.04 (0.88, 1.22)                | 0.670     | 73.37               |
| Depressive Symptoms<br>Score         | General factor                                 | 1.05 (1.01, 1.08)                | 0.008     | 99.97               |
|                                      | Adiposity factor                               | 1.03 (0.99, 1.07)                | 0.107     | 99.98               |
|                                      | Inflammation factor                            | 0.99 (0.96, 1.03)                | 0.626     | 100.00              |
|                                      | Insulin resistance factor                      | 0.98 (0.95, 1.02)                | 0.328     | 100.00              |
| Atypical Depressive<br>Symptom Score | General factor                                 | 1.06 (1.00, 1.12)                | 0.063     | 93.41               |
|                                      | Adiposity factor                               | 1.03 (0.97, 1.10)                | 0.339     | 98.12               |
|                                      | Inflammation factor                            | 1.06 (1.00, 1.13)                | 0.069     | 91.38               |
|                                      | Insulin resistance factor                      | 0.99 (0.93, 1.05)                | 0.796     | 99.83               |
| Negative Symptoms<br>Score           | General factor                                 | 0.97 (0.93, 1.01)                | 0.130     | 99.92               |
|                                      | Adiposity factor                               | 1.07 (1.02, 1.12)                | 0.005     | 92.45               |
|                                      | Inflammation factor                            | 1.03 (0.99, 1.07)                | 0.191     | 99.98               |
|                                      | Insulin resistance factor                      | 1.00 (0.95, 1.04)                | 0.861     | 100.00              |
| Psychotic Experiences                | General factor                                 | 1.20 (1.01, 1.42)                | 0.029     | 15.84               |
|                                      | Adiposity factor                               | 1.12 (0.93, 1.36)                | 0.226     | 41.93               |
|                                      | Inflammation factor                            | 1.02 (0.85, 1.22)                | 0.850     | 69.88               |
|                                      | Insulin resistance factor                      | 0.97 (0.81, 1.16)                | 0.754     | 70.36               |
| Psychotic Disorder                   | General factor                                 | 0.90 (0.62, 1.32)                | 0.570     | 34.57               |
|                                      | Adiposity factor                               | 1.09 (0.72, 1.59)                | 0.673     | 34.12               |
|                                      | Inflammation factor                            | 1.27 (0.86, 1.82)                | 0.234     | 19.64               |

## Donnelly et al: Immuno-metabolic Markers, Depression and Psychosis

|                | Insulin resistance factor | 1.10 (0.75, 1.65) | 0.621 | 33.89 |
|----------------|---------------------------|-------------------|-------|-------|
| Psychosis ARMS | General factor            | 0.76 (0.50, 1.13) | 0.171 | 16.25 |
|                | Adiposity factor          | 0.98 (0.63, 1.47) | 0.942 | 35.86 |
|                | Inflammation factor       | 0.96 (0.64, 1.44) | 0.854 | 36.54 |
|                | Insulin resistance factor | 1.17 (0.79, 1.73) | 0.427 | 28.33 |

340

### 341 3.4 Missing Data

342 Out of total 15,645 participants enrolled in ALSPAC at inception, 3,875 contributed clinic and  
343 covariate data up to age 9, and up to 3,966 participants contributed psychiatric data at age 24  
344 (**Supplementary Table 13**). A maximum of 1,611 participants contributed both exposure and  
345 outcome data (~10% of the total cohort, ~40% of all participants with outcome data). Therefore,  
346 there was substantial missingness in our dataset.

347 In a sample of participants who contributed all demographic, age 9 immuno-metabolic exposures  
348 and covariate data (n = 3,863), male sex (aOR=2.32; 95% CI 2.02-2.68), lower maternal education  
349 (aOR=0.39; 95% CI 0.29-0.50), lower maternal social class (aOR=0.62; 95% CI 0.40-0.95), and  
350 higher adiponectin levels at age 9 (aOR=1.08; 95% CI 1.01-1.16) were associated with missing  
351 psychiatric outcome data at age 24 (**Supplementary Table 14**).

## 352 4. Discussion

### 353 4.1 Main Findings

354 Using data from a prospective birth cohort, we report that childhood leptin and adiponectin are  
355 associated with largely affective symptoms (depression and psychosis negative symptoms) in  
356 adulthood. Evidence for these associations remained after controlling for covariates including BMI  
357 and inflammation and was stronger in women. Exploratory Factor Analysis of metabolic and  
358 inflammatory biomarkers revealed an underlying structure of covariance, where a general immuno-  
359 metabolic factor was associated with both depressive symptoms and psychotic experiences. We  
360 also identified three specific factors. Leptin and BMI loaded onto the adiposity factor, which was  
361 associated with negative symptoms. The inflammatory factor was associated with depressive  
362 episode and atypical depressive symptoms in women. We found no associations between the  
363 insulin resistance factor and psychiatric outcomes, although the point estimates for psychosis-  
364 related outcomes were considerably larger in men than women.

### 365 4.2 Comparison with Previous Studies

366 The association between leptin and negative symptoms is in keeping with a meta-analysis of  
367 patients with schizophrenia (Stubbs et al., 2016), although this was not observed in smaller studies  
368 of first episode of psychosis (FEP) patients (Chouinard et al., 2019; Lis et al., 2020). However, in  
369 FEP cases Lis et al., (2020) observed a correlation between leptin and cognitive dysfunction, a  
370 domain of psychopathology somewhat linked to negative symptoms. Recently, a Mendelian  
371 randomisation (MR) study did not find an association between leptin and schizophrenia (Perry et  
372 al., 2021a), bringing into question whether leptin plays a causal role in the illness. It is worth noting  
373 that this MR analysis relied on GWAS of schizophrenia, and not that of negative symptoms  
374 specifically. Therefore, replication of our findings in other longitudinal cohorts, as well as evidence  
375 triangulation using complementary methods like MR based on GWAS of negative symptoms are  
376 required to fully understand the relationship between leptin and negative symptoms.

377 Lack of association between childhood random insulin levels, or the insulin resistance factor, and  
378 positive psychotic symptoms at age 24 is consistent with a previous study from the ALSPAC cohort

## Donnelly et al: Immuno-metabolic Markers, Depression and Psychosis

379 testing association between fasting insulin and psychosis-spectrum outcomes at age 18 (Perry et  
380 al., 2019). However, using longitudinal repeat measure data, Perry et al., (2021b) recently reported  
381 that persistently raised fasting insulin levels through childhood and adolescence is associated with  
382 psychosis risk at age 24. Together, these findings suggest that persistently high leptin during  
383 development is likely relevant for adult psychosis, rather than one-off measures which do not  
384 consider variation in leptin levels over time. Nevertheless, similar to Perry et al., (2021b), we  
385 observed stronger association between the insulin resistance factor and psychosis-related  
386 outcomes in men compared with women, suggesting that early-life insulin resistance may  
387 contribute to psychosis risk in men particularly.

### 388 4.3 Potential mechanism of associations of immuno-metabolic markers and 389 depressive and psychotic symptoms

390 We observed that adiposity and inflammation were largely associated with negative and atypical  
391 depressive symptoms. There is a rich literature suggesting a role of low-grade systemic  
392 inflammation in depression (Khandaker et al., 2017; Milaneschi et al., 2021, 2020). Our findings  
393 are consistent with a previous genetic study showing that cases of atypical depression (defined by  
394 increased appetite and/or weight) have higher genetic predisposition for obesity and inflammation,  
395 particularly genetic risk variants for BMI, leptin, and CRP (Milaneschi et al., 2017). Similarly, recent  
396 MR studies from the UK Biobank and Dutch NESDA cohorts have reported associations of higher  
397 BMI and IL-6 with specific depressive symptoms such as fatigue and appetite change  
398 (Kappelmann et al., 2021; Milaneschi et al., 2021). The mechanism of the association between  
399 inflammation and depression, particularly atypical depressive symptoms (Lamers et al., 2020), has  
400 been hypothesised to involve the activation of sickness-related behaviours by inflammatory  
401 cytokines, which directly affect neuroendocrine systems involved in regulating mood and  
402 homeostatic functions such as sleep and appetite (Milaneschi et al., 2020). Further work is needed  
403 to understand how leptin, and adiposity in general, contribute to negative symptoms.

404 Negative symptoms are common in schizophrenia, with prevalence exceeding 50% (Bobes et al.,  
405 2010), and are a major contributor to morbidity (Fervaha et al., 2014; Iasevoli et al., 2018).

406 Furthermore, there is only a limited evidence base for effective treatments for these symptoms

## Donnelly et al: Immuno-metabolic Markers, Depression and Psychosis

407 (Galderisi et al., 2021). Previous work suggests two latent factors underlying negative symptoms,  
408 namely reduced expression and amotivation (Bucci and Galderisi, 2017). Studies in schizophrenia  
409 suggest an association between amotivational negative symptoms and altered reward processing,  
410 which involves brain regions associated with the dopamine system including the ventral striatum  
411 and medial prefrontal cortex (Strauss et al., 2016; Vanes et al., 2018; Wang et al., 2015; Wolf et  
412 al., 2014). Leptin has been demonstrated to both indirectly and directly affect the activity of  
413 midbrain dopamine neurons in animal models (Hommel et al., 2006; Leininger et al., 2009), as  
414 has adiponectin (Sun et al., 2019). Furthermore, a relationship between inflammation, brain reward  
415 systems and negative symptoms has been proposed (Goldsmith and Rapaport, 2020), which leptin  
416 could also modulate, given evidence of its interactions with immune system (Abella et al., 2017;  
417 Pulito-Cueto et al., 2020). Therefore, adipokines could have a direct influence on immune and  
418 neural networks involved in the pathogenesis of negative symptoms.

### 419 4.4 Strengths and Limitations

420 We used prospective data with exposures measured approximately 15 years prior to that of  
421 outcomes. We used a Bayesian approach to our statistical analysis, which is relatively novel and  
422 allowed the incorporation of prior information, and the generation of point estimates and credible  
423 intervals which have a more intuitive and robust interpretation than frequentist confidence intervals  
424 and p-values (Wagenmakers et al., 2018).

425 Limitations include missing data and pattern of missingness. Participants were not missing  
426 completely at random. Analysis of missingness in exposure data revealed that social class, and  
427 education influenced participation in the study. The complete case data came from a group from  
428 higher social class and higher educated families. One of the exposures, adiponectin, was  
429 associated with missingness, which might have introduced bias. Furthermore, >97% of the  
430 ALSPAC cohort is of white ethnicity, and so representativeness is an issue, and further studies in  
431 more diverse populations are required.

432 We used an exploratory factor analysis approach to derive immuno-metabolic factors. In future,  
433 confirmation of these findings in an independent dataset using confirmatory factor analysis is



## Donnelly et al: Immuno-metabolic Markers, Depression and Psychosis

434 required. Bifactor models have a tendency to overfitting (Bonifay and Cai, 2017) and we were  
435 limited to nine immuno-metabolic biomarkers available from the age 9 ALSPAC cohort clinic  
436 assessment. In future, inclusion of a wider range of biomarkers may help to improve latent factor  
437 estimation. Nevertheless, without pre-specifying the biomarkers that might contribute to each latent  
438 factor, we identified three specific factors (adiposity, inflammation, and insulin resistance)  
439 composed of individual biomarkers with established, intuitive links with each factor, giving our  
440 findings face validity.

441 Methods for calculating factor scores are imprecise, and scores are inherently indeterminate  
442 (Grice, 2001). Therefore, the use of extracted factor scores as exposures in separate models may  
443 have introduced error. However, the approach of combining factor scores with other datasets for  
444 further analysis, including by Bayesian approaches, has been previously applied (Dam et al., 2017;  
445 Gagne et al., 2020), and can contribute exploratory information to inform future studies. A future  
446 approach that combines (potentially longitudinally measured) biomarkers with latent factors and  
447 psychiatric outcomes in a single (Bayesian) structural equation model might inform a deeper  
448 understanding of the relationship between individual biomarkers, useful intermediate concepts  
449 (latent factors), and individual symptoms or psychopathological constructs.

### 450 4.5 Conclusions

451 Using a prospective cohort study, we report that childhood levels of the metabolic hormones leptin  
452 and adiponectin are associated with depressive and negative symptoms in early adulthood. These  
453 associations are stronger in women than men. Somewhat distinct associations were seen for  
454 immuno-metabolic factor scores, which were derived from nine immuno-metabolic measures.  
455 While a general immuno-metabolic factor was associated with both depressive and psychotic  
456 symptoms, inflammation and adiposity were particularly associated with affective (depressive,  
457 atypical depressive, and negative) symptoms. Together, these findings are consistent with the idea  
458 that childhood immuno-metabolic alterations may contribute to risk of depressive and psychotic  
459 disorders in adulthood.

Donnelly et al: Immuno-metabolic Markers, Depression and Psychosis

## 460 Acknowledgements

461 The authors would like to thank Nils Kappelmann for valuable discussions about statistical analysis  
462 and atypical depression. We are extremely grateful to all the families who took part in this study, the  
463 midwives for their help in recruiting them, and the whole ALSPAC team, which includes interviewers,  
464 computer and laboratory technicians, clerical workers, research scientists, volunteers, managers,  
465 receptionists and nurses. The views expressed are those of the authors and not necessarily those of  
466 the NIHR or the Department of Health and Social Care.

467

## 468 Funding Sources

469 The UK Medical Research Council and Wellcome (Grant ref: 217065/Z/19/Z) and the University of  
470 Bristol provide core support for ALSPAC. A comprehensive list of grant funding is available on the  
471 ALSPAC website (<http://www.bristol.ac.uk/alspac/external/documents/grant-acknowledgements.pdf> ).  
472 The outcome data from age 24 was specifically funded by MRC grants MR/L022206/1 and  
473 MR/M006727/1.

474 NAD acknowledges funding support from a National Institute for Health Research Academic Clinical  
475 Fellowship in Mental Health. BIP acknowledges funding support from the National Institute for Health  
476 Research (NIHR) (Doctoral Research Fellowship Grant No. DRF-2018-11-ST2-018). HJJ  
477 acknowledges support from the NIHR Bristol Biomedical Research Centre. GMK acknowledges  
478 funding support from the Wellcome Trust (Grant No. 201486/Z/16/Z), the Medical Research Council  
479 (Grant No. MC\_PC\_17213, Grant No. MR/S037675/1, and Grant No. MR/W014416/1), The MQ:  
480 Transforming Mental Health (Grant No. MQDS17/40), and the BMA Foundation (J. Moulton Grant  
481 2019).

## 482 Competing Interests

483 The authors declare they have no competing interests

484

Donnelly et al: Immuno-metabolic Markers, Depression and Psychosis

485 **CRedit author statement**

486 Nicholas Donnelly: Conceptualisation; Software; Data Curation; Formal Analysis; Visualization; Writing

487 – Original Draft

488 Benjamin Perry: Data Curation; Writing – Review & Editing

489 Hannah Jones: Writing – Reviewing & Editing

490 Golam Khandaker: Conceptualization; Supervision; Writing – Reviewing & Editing; Funding acquisition

491 **References**

- 492 Abella, V., Scotece, M., Conde, J., Pino, J., Gonzalez-Gay, M.A., Gómez-Reino, J.J., Mera, A., Lago,  
493 F., Gómez, R., Gualillo, O., 2017. Leptin in the interplay of inflammation, metabolism and  
494 immune system disorders. *Nat. Rev. Rheumatol.* 13, 100–109.  
495 <https://doi.org/10.1038/nrrheum.2016.209>
- 496 Benros, M.E., Nielsen, P.R., Nordentoft, M., Eaton, W.W., Dalton, S.O., Mortensen, P.B., 2011.  
497 Autoimmune diseases and severe infections as risk factors for schizophrenia: a 30-year  
498 population-based register study. *Am. J. Psychiatry* 168, 1303–1310.  
499 <https://doi.org/10.1176/appi.ajp.2011.11030516>
- 500 Benseñor, I.M., Brunoni, A.R., Pilan, L.A., Goulart, A.C., Busatto, G.F., Lotufo, P.A., Scazufca, M.,  
501 Menezes, P.R., 2012. Cardiovascular risk factors in patients with first-episode psychosis in São  
502 Paulo, Brazil. *Gen. Hosp. Psychiatry* 34, 268–275.  
503 <https://doi.org/10.1016/j.genhosppsy.2011.12.010>
- 504 Bobes, J., Arango, C., Garcia-Garcia, M., Rejas, J., CLAMORS Study Collaborative Group, 2010.  
505 Prevalence of negative symptoms in outpatients with schizophrenia spectrum disorders treated  
506 with antipsychotics in routine clinical practice: findings from the CLAMORS study. *J. Clin.*  
507 *Psychiatry* 71, 280–286. <https://doi.org/10.4088/JCP.08m04250yel>
- 508 Bonifay, W., Cai, L., 2017. On the Complexity of Item Response Theory Models. *Multivar. Behav. Res.*  
509 52, 465–484. <https://doi.org/10.1080/00273171.2017.1309262>
- 510 Boyd, A., Golding, J., Macleod, J., Lawlor, D.A., Fraser, A., Henderson, J., Molloy, L., Ness, A., Ring,  
511 S., Davey Smith, G., 2013. Cohort Profile: The ‘Children of the 90s’—the index offspring of the  
512 Avon Longitudinal Study of Parents and Children. *Int. J. Epidemiol.* 42, 111–127.  
513 <https://doi.org/10.1093/ije/dys064>
- 514 Bucci, P., Galderisi, S., 2017. Categorizing and assessing negative symptoms. *Curr. Opin. Psychiatry*  
515 30, 201–208. <https://doi.org/10.1097/YCO.0000000000000322>
- 516 Bürkner, P.-C., 2017. brms: An R Package for Bayesian Multilevel Models Using Stan. *J. Stat. Softw.*  
517 80, 1–28. <https://doi.org/10.18637/jss.v080.i01>

Donnelly et al: Immuno-metabolic Markers, Depression and Psychosis

- 518 Carpenter, B., Gelman, A., Hoffman, M.D., Lee, D., Goodrich, B., Betancourt, M., Brubaker, M., Guo,  
519 J., Li, P., Riddell, A., 2017. Stan: A Probabilistic Programming Language. *J. Stat. Softw.* 76, 1–  
520 32. <https://doi.org/10.18637/jss.v076.i01>
- 521 Chouinard, V.-A., Henderson, D.C., Man, C.D., Valeri, L., Gray, B.E., Ryan, K.P., Cypess, A.M.,  
522 Cobelli, C., Cohen, B.M., Öngür, D., 2019. Impaired insulin signaling in unaffected siblings and  
523 patients with first episode psychosis. *Mol. Psychiatry* 24, 1513–1522.  
524 <https://doi.org/10.1038/s41380-018-0045-1>
- 525 Considine, R.V., Sinha, M.K., Heiman, M.L., Kriauciunas, A., Stephens, T.W., Nyce, M.R.,  
526 Ohannesian, J.P., Marco, C.C., McKee, L.J., Bauer, T.L., Caro, J.F., 1996. Serum  
527 Immunoreactive-Leptin Concentrations in Normal-Weight and Obese Humans. *N. Engl. J. Med.*  
528 334, 292–295. <https://doi.org/10.1056/NEJM199602013340503>
- 529 Dam, N.T.V., O'Connor, D., Marcelle, E.T., Ho, E.J., Craddock, R.C., Tobe, R.H., Gabbay, V.,  
530 Hudziak, J.J., Castellanos, F.X., Leventhal, B.L., Milham, M.P., 2017. Data-Driven Phenotypic  
531 Categorization for Neurobiological Analyses: Beyond DSM-5 Labels. *Biol. Psychiatry* 81, 484–  
532 494. <https://doi.org/10.1016/j.biopsych.2016.06.027>
- 533 Eaton, W.W., Byrne, M., Ewald, H., Mors, O., Chen, C.-Y., Agerbo, E., Mortensen, P.B., 2006.  
534 Association of schizophrenia and autoimmune diseases: linkage of Danish national registers.  
535 *Am. J. Psychiatry* 163, 521–528. <https://doi.org/10.1176/appi.ajp.163.3.521>
- 536 Falaschetti, E., Hingorani, A.D., Jones, A., Charakida, M., Finer, N., Whincup, P., Lawlor, D.A., Davey  
537 Smith, G., Sattar, N., Deanfield, J.E., 2010. Adiposity and cardiovascular risk factors in a large  
538 contemporary population of pre-pubertal children. *Eur. Heart J.* 31, 3063–3072.  
539 <https://doi.org/10.1093/eurheartj/ehq355>
- 540 Fervaha, G., Foussias, G., Agid, O., Remington, G., 2014. Motivational and neurocognitive deficits are  
541 central to the prediction of longitudinal functional outcome in schizophrenia. *Acta Psychiatr.*  
542 *Scand.* 130, 290–299. <https://doi.org/10.1111/acps.12289>
- 543 Fraser, A., Macdonald-Wallis, C., Tilling, K., Boyd, A., Golding, J., Davey Smith, G., Henderson, J.,  
544 Macleod, J., Molloy, L., Ness, A., Ring, S., Nelson, S.M., Lawlor, D.A., 2013. Cohort Profile:  
545 The Avon Longitudinal Study of Parents and Children: ALSPAC mothers cohort. *Int. J.*  
546 *Epidemiol.* 42, 97–110. <https://doi.org/10.1093/ije/dys066>

Donnelly et al: Immuno-metabolic Markers, Depression and Psychosis

- 547 Fried, E.I., 2017. The 52 symptoms of major depression: Lack of content overlap among seven  
548 common depression scales. *J. Affect. Disord.* 208, 191–197.  
549 <https://doi.org/10.1016/j.jad.2016.10.019>
- 550 Gagne, C., Zika, O., Dayan, P., Bishop, S.J., 2020. Impaired adaptation of learning to contingency  
551 volatility in internalizing psychopathology. *eLife* 9, e61387. <https://doi.org/10.7554/eLife.61387>
- 552 Galderisi, S., Kaiser, S., Bitter, I., Nordentoft, M., Mucci, A., Sabé, M., Giordano, G.M., Nielsen, M.Ø.,  
553 Glenthøj, L.B., Pezzella, P., Falkai, P., Dollfus, S., Gaebel, W., 2021. EPA guidance on  
554 treatment of negative symptoms in schizophrenia. *Eur. Psychiatry* 64, e21.  
555 <https://doi.org/10.1192/j.eurpsy.2021.13>
- 556 Gimeno, D., Kivimäki, M., Brunner, E.J., Elovainio, M., De Vogli, R., Steptoe, A., Kumari, M., Lowe,  
557 G.D.O., Rumley, A., Marmot, M.G., Ferrie, J.E., 2009. Associations of C-reactive protein and  
558 interleukin-6 with cognitive symptoms of depression: 12-year follow-up of the Whitehall II study.  
559 *Psychol. Med.* 39, 413–423. <https://doi.org/10.1017/S0033291708003723>
- 560 Golding, Pembrey, Jones, Team, T.A.S., 2001. ALSPAC—The Avon Longitudinal Study of Parents and  
561 Children. *Paediatr. Perinat. Epidemiol.* 15, 74–87. [https://doi.org/10.1046/j.1365-  
562 3016.2001.00325.x](https://doi.org/10.1046/j.1365-3016.2001.00325.x)
- 563 Goldsmith, D.R., Rapaport, M.H., 2020. Inflammation and Negative Symptoms of Schizophrenia:  
564 Implications for Reward Processing and Motivational Deficits. *Front. Psychiatry* 11, 46.  
565 <https://doi.org/10.3389/fpsy.2020.00046>
- 566 Grice, J., 2001. Computing and evaluating factor scores. *Psychol. Methods* 6, 430–50.
- 567 Harris, P.A., Taylor, R., Minor, B.L., Elliott, V., Fernandez, M., O’Neal, L., McLeod, L., Delacqua, G.,  
568 Delacqua, F., Kirby, J., Duda, S.N., REDCap Consortium, 2019. The REDCap consortium:  
569 Building an international community of software platform partners. *J. Biomed. Inform.* 95,  
570 103208. <https://doi.org/10.1016/j.jbi.2019.103208>
- 571 Harris, P.A., Taylor, R., Thielke, R., Payne, J., Gonzalez, N., Conde, J.G., 2009. Research electronic  
572 data capture (REDCap)—a metadata-driven methodology and workflow process for providing  
573 translational research informatics support. *J. Biomed. Inform.* 42, 377–381.  
574 <https://doi.org/10.1016/j.jbi.2008.08.010>

Donnelly et al: Immuno-metabolic Markers, Depression and Psychosis

- 575 Hoang, U., Goldacre, M.J., Stewart, R., 2013. Avoidable mortality in people with schizophrenia or  
576 bipolar disorder in England. *Acta Psychiatr. Scand.* 127, 195–201.  
577 <https://doi.org/10.1111/acps.12045>
- 578 Hommel, J.D., Trinko, R., Sears, R.M., Georgescu, D., Liu, Z.W., Gao, X.B., Thurmon, J.J., Marinelli,  
579 M., DiLeone, R.J., 2006. Leptin receptor signaling in midbrain dopamine neurons regulates  
580 feeding. *Neuron* 51, 801–810.
- 581 Iasevoli, F., Avagliano, C., Altavilla, B., Barone, A., D'Ambrosio, L., Matrone, M., Notar Francesco, D.,  
582 Razzino, E., de Bartolomeis, A., 2018. Disease Severity in Treatment Resistant Schizophrenia  
583 Patients Is Mainly Affected by Negative Symptoms, Which Mediate the Effects of Cognitive  
584 Dysfunctions and Neurological Soft Signs. *Front. Psychiatry* 9, 553.  
585 <https://doi.org/10.3389/fpsy.2018.00553>
- 586 Jerry, R.G., Lesley, V.C., 2006. Relationship Between Inflammation, Insulin Resistance and Type 2  
587 Diabetes: Cause or Effect? *Curr. Diabetes Rev.* 2, 195–211.
- 588 Jones, H.J., Stergiakouli, E., Tansey, K.E., Hubbard, L., Heron, J., Cannon, M., Holmans, P., Lewis,  
589 G., Linden, D.E.J., Jones, P.B., Davey Smith, G., O'Donovan, M.C., Owen, M.J., Walters, J.T.,  
590 Zammit, S., 2016. Phenotypic Manifestation of Genetic Risk for Schizophrenia During  
591 Adolescence in the General Population. *JAMA Psychiatry* 73, 221.  
592 <https://doi.org/10.1001/jamapsychiatry.2015.3058>
- 593 Kappelmann, N., Arloth, J., Georgakis, M.K., Czamara, D., Rost, N., Ligthart, S., Khandaker, G.M.,  
594 Binder, E.B., 2021. Dissecting the Association Between Inflammation, Metabolic Dysregulation,  
595 and Specific Depressive Symptoms: A Genetic Correlation and 2-Sample Mendelian  
596 Randomization Study. *JAMA Psychiatry* 78, 161–170.  
597 <https://doi.org/10.1001/jamapsychiatry.2020.3436>
- 598 Khandaker, G.M., Dantzer, R., Jones, P.B., 2017. Immunopsychiatry: important facts. *Psychol. Med.*  
599 47, 2229–2237. <https://doi.org/10.1017/S0033291717000745>
- 600 Khandaker, G.M., Pearson, R.M., Zammit, S., Lewis, G., Jones, P.B., 2014. Association of serum  
601 interleukin 6 and C-reactive protein in childhood with depression and psychosis in young adult  
602 life: a population-based longitudinal study. *JAMA Psychiatry* 71, 1121–1128.  
603 <https://doi.org/10.1001/jamapsychiatry.2014.1332>



Donnelly et al: Immuno-metabolic Markers, Depression and Psychosis

- 604 Konings, M., Bak, M., Hanssen, M., van Os, J., Krabbendam, L., 2006. Validity and reliability of the  
605 CAPE: a self-report instrument for the measurement of psychotic experiences in the general  
606 population. *Acta Psychiatr. Scand.* 114, 55–61. [https://doi.org/10.1111/j.1600-](https://doi.org/10.1111/j.1600-0447.2005.00741.x)  
607 [0447.2005.00741.x](https://doi.org/10.1111/j.1600-0447.2005.00741.x)
- 608 Kruschke, J.K., Liddell, T.M., 2018. Bayesian data analysis for newcomers. *Psychon. Bull. Rev.* 25,  
609 155–177. <https://doi.org/10.3758/s13423-017-1272-1>
- 610 Lamers, F., Milaneschi, Y., Vinkers, C.H., Schoevers, R.A., Giltay, E.J., Penninx, B.W.J.H., 2020.  
611 Depression profilers and immuno-metabolic dysregulation: Longitudinal results from the  
612 NESDA study. *Brain. Behav. Immun.* 88, 174–183. <https://doi.org/10.1016/j.bbi.2020.04.002>
- 613 Leininger, G.M., Jo, Y.-H., Leshan, R.L., Louis, G.W., Yang, H., Barrera, J.G., Wilson, H., Opland,  
614 D.M., Faouzi, M.A., Gong, Y., 2009. Leptin Acts via Leptin Receptor-Expressing Lateral  
615 Hypothalamic Neurons to Modulate the Mesolimbic Dopamine System and Suppress Feeding.  
616 *Cell Metab.* 10, 89–98. <https://doi.org/10.1016/j.cmet.2009.06.011>
- 617 Lewis, G., Pelosi, A.J., Araya, R., Dunn, G., 1992. Measuring psychiatric disorder in the community: a  
618 standardized assessment for use by lay interviewers. *Psychol. Med.* 22, 465–486.  
619 <https://doi.org/10.1017/s0033291700030415>
- 620 Lis, M., Stańczykiewicz, B., Pawlik-Sobecka, L., Samochowiec, A., Regina, A., Misiak, B., 2020.  
621 Assessment of Appetite-Regulating Hormones Provides Further Evidence of Altered  
622 Adipoinular Axis in Early Psychosis. *Front. Psychiatry* 11, 480.  
623 <https://doi.org/10.3389/fpsy.2020.00480>
- 624 Makowski, D., Ben-Shachar, M.S., Chen, S.H.A., Lüdecke, D., 2019a. Indices of Effect Existence and  
625 Significance in the Bayesian Framework. *Front. Psychol.* 10.  
626 <https://doi.org/10.3389/fpsyg.2019.02767>
- 627 Makowski, D., Ben-Shachar, M.S., Lüdecke, D., 2019b. bayestestR: Describing Effects and their  
628 Uncertainty, Existence and Significance within the Bayesian Framework. *J. Open Source*  
629 *Softw.* 4, 1541. <https://doi.org/10.21105/joss.01541>
- 630 McElreath, R., 2018. *Statistical Rethinking: A Bayesian Course with Examples in R and Stan,*  
631 *Statistical Rethinking: A Bayesian Course with Examples in R and Stan.*  
632 <https://doi.org/10.1201/9781315372495>



Donnelly et al: Immuno-metabolic Markers, Depression and Psychosis

- 633 Metcalf, S.A., Jones, P.B., Nordstrom, T., Timonen, M., Mäki, P., Miettunen, J., Jääskeläinen, E.,  
634 Järvelin, M.-R., Stochl, J., Murray, G.K., Veijola, J., Khandaker, G.M., 2017. Serum C-reactive  
635 protein in adolescence and risk of schizophrenia in adulthood: A prospective birth cohort study.  
636 *Brain. Behav. Immun.* 59, 253–259. <https://doi.org/10.1016/j.bbi.2016.09.008>
- 637 Milaneschi, Y., Kappelmann, N., Ye, Z., Lamers, F., Moser, S., Jones, P.B., Burgess, S., Penninx,  
638 B.W.J.H., Khandaker, G.M., 2021. Association of inflammation with depression and anxiety:  
639 evidence for symptom-specificity and potential causality from UK Biobank and NESDA cohorts.  
640 *Mol. Psychiatry.* <https://doi.org/10.1038/s41380-021-01188-w>
- 641 Milaneschi, Y., Lamers, F., Berk, M., Penninx, B.W.J.H., 2020. Depression Heterogeneity and Its  
642 Biological Underpinnings: Toward Immunometabolic Depression. *Biol. Psychiatry, Molecular*  
643 *Underpinnings of Depression and Its Treatment* 88, 369–380.  
644 <https://doi.org/10.1016/j.biopsych.2020.01.014>
- 645 Milaneschi, Y., Lamers, F., Peyrot, W.J., Baune, B.T., Breen, G., Dehghan, A., Forstner, A.J., Grabe,  
646 H.J., Homuth, G., Kan, C., Lewis, C., Mullins, N., Nauck, M., Pistis, G., Preisig, M., Rivera, M.,  
647 Rietschel, M., Streit, F., Strohmaier, J., Teumer, A., Van der Auwera, S., Wray, N.R.,  
648 Boomsma, D.I., Penninx, B.W.J.H., for the CHARGE Inflammation Working Group and the  
649 Major Depressive Disorder Working Group of the Psychiatric Genomics Consortium, 2017.  
650 Genetic Association of Major Depression With Atypical Features and Obesity-Related  
651 Immunometabolic Dysregulations. *JAMA Psychiatry* 74, 1214–1225.  
652 <https://doi.org/10.1001/jamapsychiatry.2017.3016>
- 653 Milaneschi, Y., Simmons, W.K., van Rossum, E.F.C., Penninx, B.W., 2019. Depression and obesity:  
654 evidence of shared biological mechanisms. *Mol. Psychiatry* 24, 18–33.  
655 <https://doi.org/10.1038/s41380-018-0017-5>
- 656 Northstone, K., Lewcock, M., Groom, A., Boyd, A., Macleod, J., Timpson, N., Wells, N., 2019. The  
657 Avon Longitudinal Study of Parents and Children (ALSPAC): an update on the enrolled sample  
658 of index children in 2019. *Wellcome Open Res.* 4, 51.  
659 <https://doi.org/10.12688/wellcomeopenres.15132.1>
- 660 Ong, K.K., Petry, C.J., Emmett, P.M., Sandhu, M.S., Kiess, W., Hales, C.N., Ness, A.R., Dunger, D.B.,  
661 ALSPAC study team, 2004. Insulin sensitivity and secretion in normal children related to size at

Donnelly et al: Immuno-metabolic Markers, Depression and Psychosis

- 662 birth, postnatal growth, and plasma insulin-like growth factor-I levels. *Diabetologia* 47, 1064–  
663 1070. <https://doi.org/10.1007/s00125-004-1405-8>
- 664 Osimo, E.F., Baxter, L.J., Lewis, G., Jones, P.B., Khandaker, G.M., 2019. Prevalence of low-grade  
665 inflammation in depression: a systematic review and meta-analysis of CRP levels. *Psychol.*  
666 *Med.* 49, 1958–1970. <https://doi.org/10.1017/S0033291719001454>
- 667 Penninx, B.W., Beekman, A.T., Honig, A., Deeg, D.J., Schoevers, R.A., van Eijk, J.T., van Tilburg, W.,  
668 2001. Depression and cardiac mortality: results from a community-based longitudinal study.  
669 *Arch. Gen. Psychiatry* 58, 221–227. <https://doi.org/10.1001/archpsyc.58.3.221>
- 670 Perry, B.I., Burgess, S., Jones, H.J., Zammit, S., Upthegrove, R., Mason, A.M., Day, F.R.,  
671 Langenberg, C., Wareham, N.J., Jones, P.B., Khandaker, G.M., 2021a. The potential shared  
672 role of inflammation in insulin resistance and schizophrenia: A bidirectional two-sample  
673 mendelian randomization study. *PLoS Med.* 18, e1003455.  
674 <https://doi.org/10.1371/journal.pmed.1003455>
- 675 Perry, B.I., McIntosh, G., Weich, S., Singh, S., Rees, K., 2016. The association between first-episode  
676 psychosis and abnormal glycaemic control: systematic review and meta-analysis. *Lancet*  
677 *Psychiatry* 3, 1049–1058. [https://doi.org/10.1016/S2215-0366\(16\)30262-0](https://doi.org/10.1016/S2215-0366(16)30262-0)
- 678 Perry, B.I., Stochl, J., Upthegrove, R., Zammit, S., Wareham, N., Langenberg, C., Winpenny, E.,  
679 Dunger, D., Jones, P.B., Khandaker, G.M., 2021b. Longitudinal Trends in Childhood Insulin  
680 Levels and Body Mass Index and Associations With Risks of Psychosis and Depression in  
681 Young Adults. *JAMA Psychiatry*. <https://doi.org/10.1001/jamapsychiatry.2020.4180>
- 682 Perry, B.I., Upthegrove, R., Thompson, A., Marwaha, S., Zammit, S., Singh, S.P., Khandaker, G.,  
683 2019. Dysglycaemia, Inflammation and Psychosis: Findings From the UK ALSPAC Birth  
684 Cohort. *Schizophr. Bull.* 45, 330–338. <https://doi.org/10.1093/schbul/sby040>
- 685 Pillinger, T., Beck, K., Gobjila, C., Donocik, J.G., Jauhar, S., Howes, O.D., 2017. Impaired Glucose  
686 Homeostasis in First-Episode Schizophrenia: A Systematic Review and Meta-analysis. *JAMA*  
687 *Psychiatry* 74, 261–269. <https://doi.org/10.1001/jamapsychiatry.2016.3803>
- 688 Pulito-Cueto, V., Remuzgo-Martínez, S., Genre, F., Calvo-Alén, J., Aurrecochea, E., Llorente, I.,  
689 Triguero-Martinez, A., Blanco, R., Llorca, J., Ruiz-Lucea, E., Rivera-García, N., Gualillo, O.,

Donnelly et al: Immuno-metabolic Markers, Depression and Psychosis

- 690 López-Mejías, R., Castañeda, S., González-Gay, M.A., 2020. Anti-IL-6 therapy reduces leptin  
691 serum levels in patients with rheumatoid arthritis. *Clin. Exp. Rheumatol.*
- 692 R Development Core Team, 2017. R: A Language and environment for statistical computing. Vienna  
693 Austria R Found. Stat. Comput.
- 694 Stefanis, N.C., Hanssen, M., Smirnis, N.K., Avramopoulos, D.A., Evdokimidis, I.K., Stefanis, C.N.,  
695 Verdoux, H., Van Os, J., 2002. Evidence that three dimensions of psychosis have a distribution  
696 in the general population. *Psychol. Med.* 32, 347–358.  
697 <https://doi.org/10.1017/s0033291701005141>
- 698 Strauss, G.P., Whearty, K.M., Morra, L.F., Sullivan, S.K., Ossenfort, K.L., Frost, K.H., 2016. Avolition  
699 in schizophrenia is associated with reduced willingness to expend effort for reward on a  
700 Progressive Ratio task. *Schizophr. Res.* 170, 198–204.  
701 <https://doi.org/10.1016/j.schres.2015.12.006>
- 702 Stubbs, B., Wang, A.K., Vancampfort, D., Miller, B.J., 2016. Are leptin levels increased among people  
703 with schizophrenia versus controls? A systematic review and comparative meta-analysis.  
704 *Psychoneuroendocrinology* 63, 144–154. <https://doi.org/10.1016/j.psyneuen.2015.09.026>
- 705 Sullivan, S.A., Kounali, D., Cannon, M., David, A.S., Fletcher, P.C., Holmans, P., Jones, H., Jones,  
706 P.B., Linden, D.E.J., Lewis, G., Owen, M.J., O'Donovan, M., Rammos, A., Thompson, A.,  
707 Wolke, D., Heron, J., Zammit, S., 2020. A Population-Based Cohort Study Examining the  
708 Incidence and Impact of Psychotic Experiences From Childhood to Adulthood, and Prediction  
709 of Psychotic Disorder. *Am. J. Psychiatry* 177, 308–317.  
710 <https://doi.org/10.1176/appi.ajp.2019.19060654>
- 711 Sun, F., Lei, Y., You, J., Li, C., Sun, L., Garza, J., Zhang, D., Guo, M., Scherer, P.E., Lodge, D., Lu,  
712 X.-Y., 2019. Adiponectin modulates ventral tegmental area dopamine neuron activity and  
713 anxiety-related behavior through AdipoR1. *Mol. Psychiatry* 24, 126–144.  
714 <https://doi.org/10.1038/s41380-018-0102-9>
- 715 Timpson, N.J., Nordestgaard, B.G., Harbord, R.M., Zacho, J., Frayling, T.M., Tybjaerg-Hansen, A.,  
716 Davey Smith, G., 2011. C-reactive protein levels and body mass index: elucidating direction of  
717 causation through reciprocal Mendelian randomization. *Int. J. Obes.* 35, 300–308.  
718 <https://doi.org/10.1038/ijo.2010.137>

Donnelly et al: Immuno-metabolic Markers, Depression and Psychosis

- 719 van Dielen, F.M.H., van't Veer, C., Schols, A.M., Soeters, P.B., Buurman, W.A., Greve, J.W.M., 2001.  
720 Increased leptin concentrations correlate with increased concentrations of inflammatory  
721 markers in morbidly obese individuals. *Int. J. Obes.* 25, 1759–1766.  
722 <https://doi.org/10.1038/sj.ijo.0801825>
- 723 van Melle, J.P., de Jonge, P., Spijkerman, T.A., Tijssen, J.G.P., Ormel, J., van Veldhuisen, D.J., van  
724 den Brink, R.H.S., van den Berg, M.P., 2004. Prognostic association of depression following  
725 myocardial infarction with mortality and cardiovascular events: a meta-analysis. *Psychosom.*  
726 *Med.* 66, 814–822. <https://doi.org/10.1097/01.psy.0000146294.82810.9c>
- 727 Vancampfort, D., Stubbs, B., Mitchell, A.J., Hert, M.D., Wampers, M., Ward, P.B., Rosenbaum, S.,  
728 Correll, C.U., 2015. Risk of metabolic syndrome and its components in people with  
729 schizophrenia and related psychotic disorders, bipolar disorder and major depressive disorder:  
730 a systematic review and meta-analysis. *World Psychiatry* 14, 339–347.  
731 <https://doi.org/10.1002/wps.20252>
- 732 Vanes, L.D., Mouchlianitis, E., Collier, T., Averbeck, B.B., Shergill, S.S., 2018. Differential neural  
733 reward mechanisms in treatment-responsive and treatment-resistant schizophrenia. *Psychol.*  
734 *Med.* 48, 2418–2427. <https://doi.org/10.1017/S0033291718000041>
- 735 Wagenmakers, E.-J., Marsman, M., Jamil, T., Ly, A., Verhagen, J., Love, J., Selker, R., Gronau, Q.F.,  
736 Šmíra, M., Epskamp, S., Matzke, D., Rouder, J.N., Morey, R.D., 2018. Bayesian inference for  
737 psychology. Part I: Theoretical advantages and practical ramifications. *Psychon. Bull. Rev.* 25,  
738 35–57. <https://doi.org/10.3758/s13423-017-1343-3>
- 739 Wang, J., Huang, J., Yang, X.-H., Lui, S.S.Y., Cheung, E.F.C., Chan, R.C.K., 2015. Anhedonia in  
740 schizophrenia: Deficits in both motivation and hedonic capacity. *Schizophr. Res.* 168, 465–474.  
741 <https://doi.org/10.1016/j.schres.2015.06.019>
- 742 Wolf, D.H., Satterthwaite, T.D., Kantrowitz, J.J., Katchmar, N., Vandekar, L., Elliott, M.A., Ruparel, K.,  
743 2014. Amotivation in schizophrenia: integrated assessment with behavioral, clinical, and  
744 imaging measures. *Schizophr. Bull.* 40, 1328–1337. <https://doi.org/10.1093/schbul/sbu026>
- 745 Yudkin, J.S., Stehouwer, C.D.A., Emeis, J.J., Coppack, S.W., 1999. C-Reactive Protein in Healthy  
746 Subjects: Associations With Obesity, Insulin Resistance, and Endothelial Dysfunction.  
747 *Arterioscler. Thromb. Vasc. Biol.* 19, 972–978. <https://doi.org/10.1161/01.ATV.19.4.972>

Donnelly et al: Immuno-metabolic Markers, Depression and Psychosis

- 748 Zalli, A., Jovanova, O., Hoogendijk, W.J.G., Tiemeier, H., Carvalho, L.A., 2016. Low-grade  
749 inflammation predicts persistence of depressive symptoms. *Psychopharmacology (Berl.)* 233,  
750 1669–1678. <https://doi.org/10.1007/s00213-015-3919-9>
- 751 Zammit, S., Kounali, D., Cannon, M., David, A.S., Gunnell, D., Heron, J., Jones, P.B., Lewis, S.,  
752 Sullivan, S., Wolke, D., Lewis, G., 2013. Psychotic experiences and psychotic disorders at age  
753 18 in relation to psychotic experiences at age 12 in a longitudinal population-based cohort  
754 study. *Am. J. Psychiatry* 170, 742–750. <https://doi.org/10.1176/appi.ajp.2013.12060768>  
755
